# Supplementary material
Source: PubMed Central journal article supplement (PMC5035417)
Supplement: JCM.01052-16_zjm999095164so1.pdf [file JCM.01052-16_zjm999095164so1.pdf]

**Figure A1.** Sequencing outcome proportions for each norovirus genotype. Pass, >90% genome coverage and >100-fold read depth; Sub-optimal, >90% genome coverage or >100-fold read depth; Fail, , <90% genome coverage and <100-fold read depth. Genotype refers to capsid genotype only.

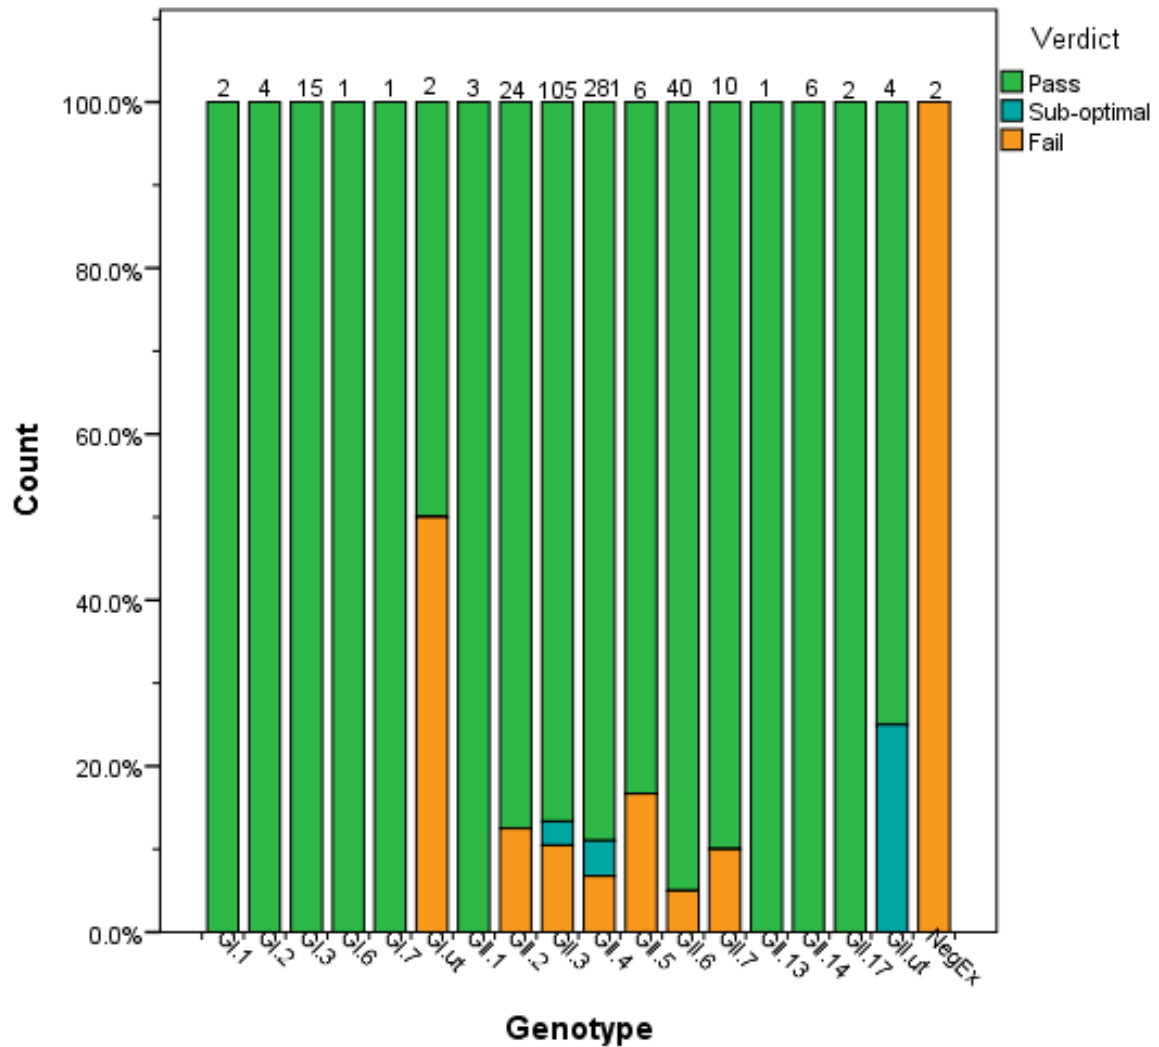

**Figure A2.** Correlation of read depth and % OTR across all samples (n = 507).  $R = 0.757$ ,  $P < 0.001$  (Spearman's correlation)

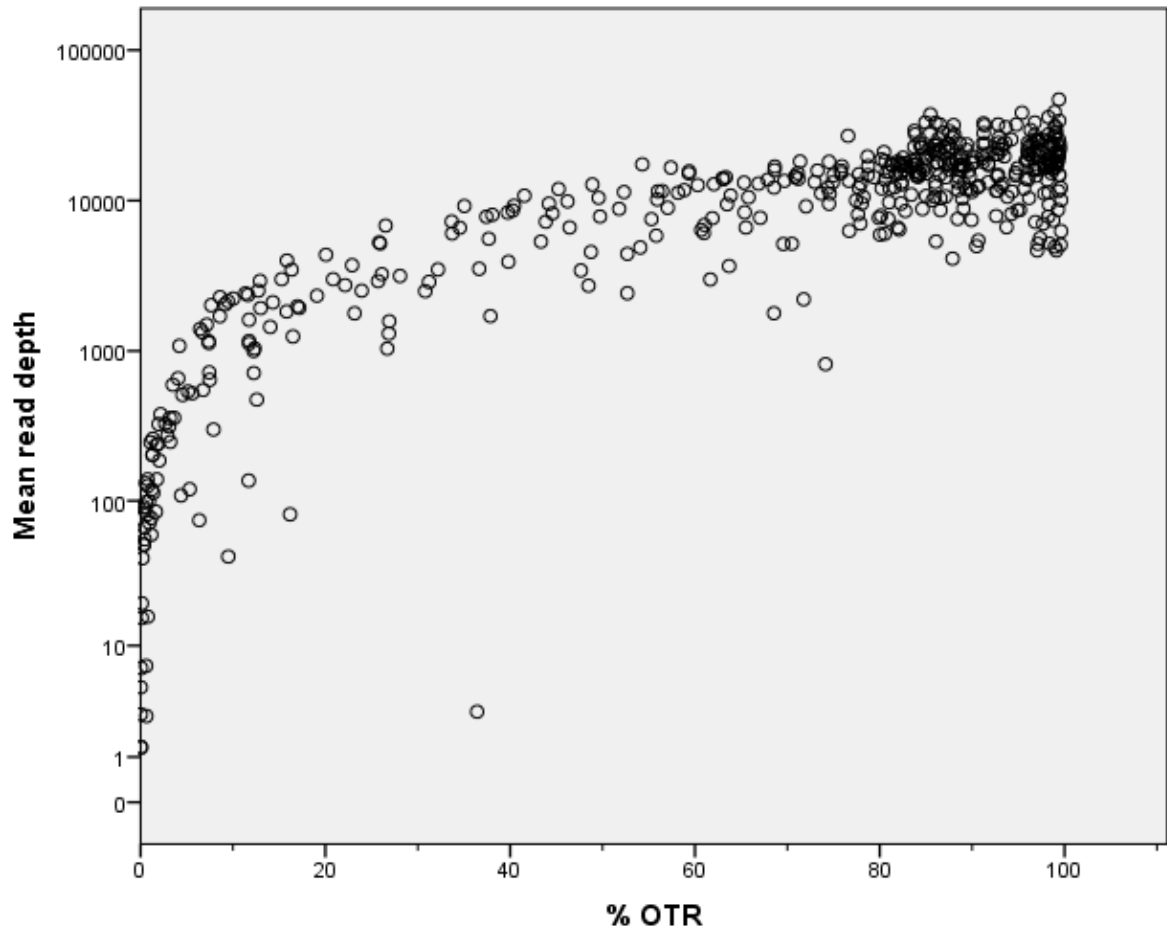

**Figure A3.** % genome coverage and Ct value, with sequencing runs 30 and 31 highlighted. Green circles highlight outliers that cannot be explained by Sequencing runs 30 and 31

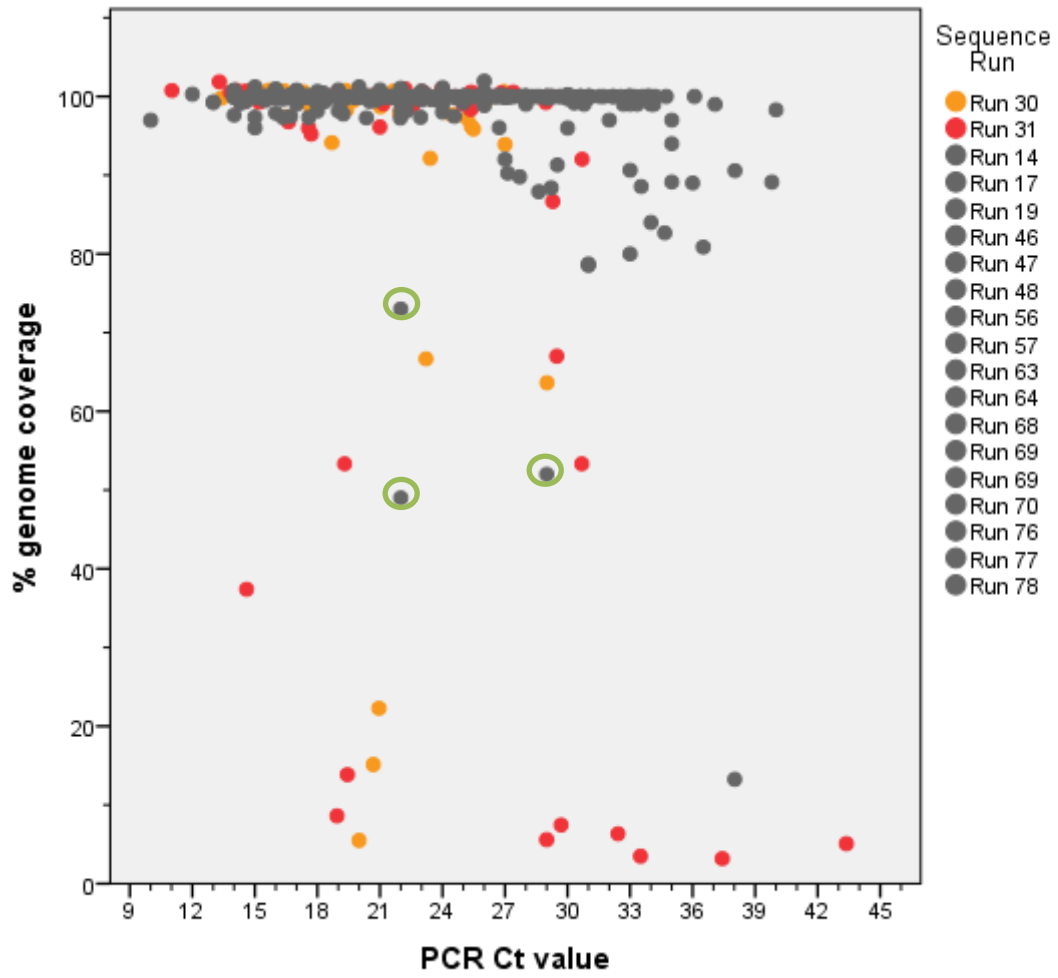

**Table A1.** Sequencing results of samples with RT-qPCR Ct value <30 and unexpectedly low % genome coverage (<80%), excluding samples from sequencing runs 30 and 31 (n = 3; highlighted in Supplementary Figure 2).

| Sample name | Genotype | RT-qPCR Ct value | % genome coverage | % OTR* | Average read depth |
|-------------|----------|------------------|-------------------|--------|--------------------|
| NOR_2431    | GII.5    | 22               | 49%               | 0.01%  | 1                  |
| NOR_2488    | GII.4    | 29               | 52%               | 6.76%  | 137                |
| NOR_2500    | GII.4    | 22               | 73%               | 2.53%  | 120                |

\*% OTR, % on-target-reads

**Figure A4.** Alignment of samples with RT-qPCR Ct value <30 and unexpectedly low % genome coverage (<80%), excluding samples from sequencing runs 30 and 31 (n = 3; highlighted in Supplementary Figure 2 and detailed in Supplementary Table 1).

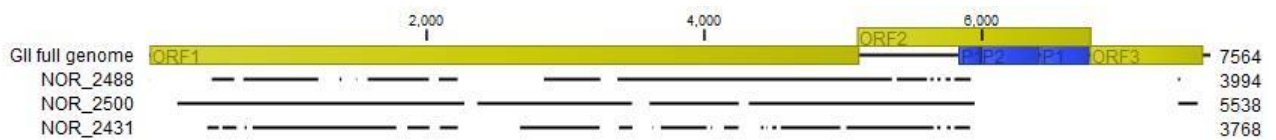

**Figure A5.** Nucleotide alignment of all samples with real-time PCR Ct value ≥36 (i.e. apparently low titre) but >80% genome coverage (n = 7) by SureSelect target enrichment sequencing

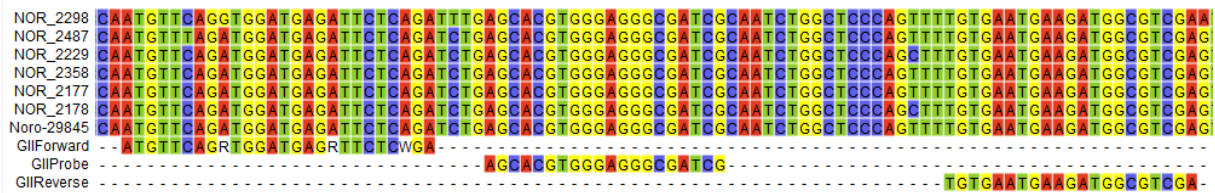

Degenerate nucleotide code: R, A/G; W, A/T

**Table A2.** Genotyping success of samples processed in parallel by SureSelect target enrichment for full genome sequencing and PCR amplification of capsid shell domain followed by Sanger sequencing

|               | Full genome sequenced | Full genome failed** | Total      |
|---------------|-----------------------|----------------------|------------|
| PCR amplified | 158                   | 0                    | 158 (96%)  |
| PCR failed*   | 6                     | 0                    | 6          |
| <b>Total</b>  | <b>164 (100%)</b>     | <b>0</b>             | <b>164</b> |

\* no amplification by PCR

\*\* <90% genome coverage and <100-fold read depth

**Table A3.** Sequencing results of samples that failed to amplify the capsid shell domain by PCR for genotyping, but were successfully sequenced (>99% genome coverage) by SureSelect target enrichment (n=6).

| Sample name | Genotype | RT-qPCR Ct value | % genome coverage | % OTR* | Average read depth |
|-------------|----------|------------------|-------------------|--------|--------------------|
| NOR_2266    | GI.3     | 20               | 100%              | 70%    | 13,957             |
| NOR_2568    | GII.7    | 31               | 99%               | 83%    | 11,235             |
| NOR_2567    | GII.4    | 27               | 100%              | 91%    | 23,068             |
| NOR_2360    | GII.4    | 33               | 100%              | 15%    | 3,995              |
| NOR_2359    | GII.4    | 33               | 100%              | 8%     | 2,281              |
| NOR_2358    | GII.4    | 37               | 99%               | 55%    | 11,740             |

\*% OTR, % on-target-reads

**Figure A6.** Nucleotide alignment of all GII (n=5) and GI (n=1) samples that failed to amplify the capsid shell domain by PCR for genotyping, but were successfully sequenced (>99% genome coverage) by SureSelect target enrichment. Additional sequences (labelled with genotype) that were genotyped successfully are included for comparison. Mismatches predicted to cause amplification failure are circled. **(a)** GII forward; **(b)** GII nested forward; **(c)** GII reverse; **(d)** GI forward; **(e)** GI nested forward; **(f)** GI reverse

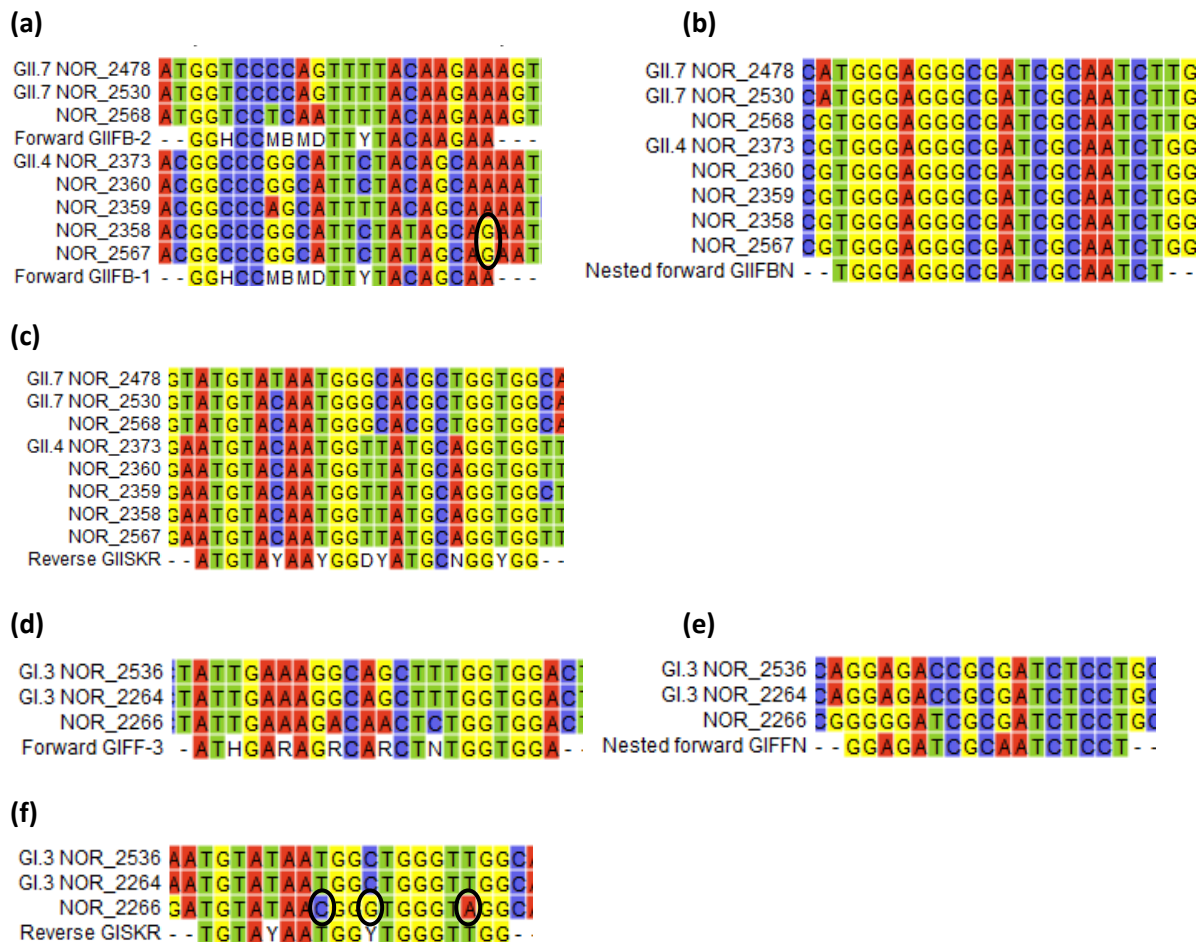

Degenerate nucleotide code: H, A/C/T; M, A/C; B, G/T/C; D, G/A/T; Y, C/T; R, A/G; N, G/C/A/T

**Figure A7.** Distribution of **(a)** mean read depth and **(b)** % genome coverage for stool samples and negative extracts. Red lines indicate median values

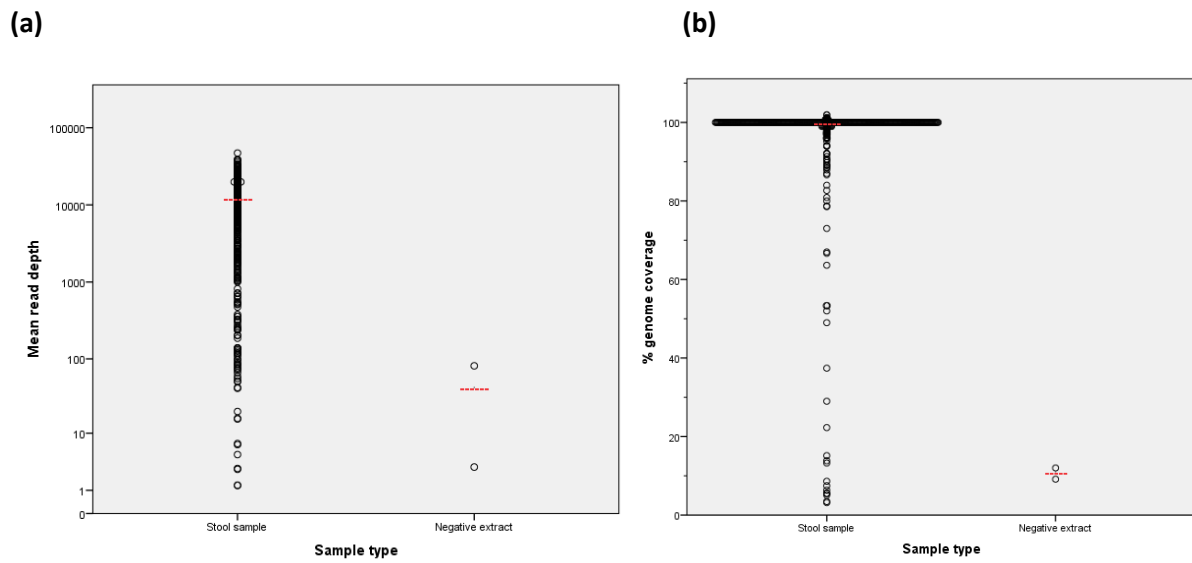

**Figure A8.** Contigs generated from Negative Extract mapping to norovirus full genome

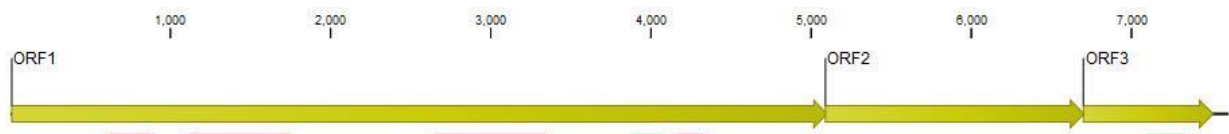

**Table A4.** Mixed infections in clinical specimens identified during assembly pipeline

| Sample name | Genotypes present      | Step in assembly pipeline that identified mixed infection | Number of reads mapping to each genotype in filtering step |
|-------------|------------------------|-----------------------------------------------------------|------------------------------------------------------------|
| NOR_2565    | GII.3, GII.4 and GII.2 | Filtering step (mapping to reference list)                | GII.3: 792,264<br>GII.4: 113,068<br>GII.2: 859,899         |
| NOR_2276    | GII.3 and GII.6        | Filtering step (mapping to reference list)                | GII.3: 425,961<br>GII.6: 373,439                           |
| 13V35152    | GII.3 and GII.4        | Align contigs to reference                                | GII.4: 470,377<br>GII.3: 1,155                             |

**Table A5.** Comparison of consensus sequences generated from *de novo* assembly in single infections (original) and a simulated mixed infection (mixed).

|                       | <b>Samples data originates from</b> | <b>Number of reads mapping</b> | <b>Read depth</b> | <b>Consensus sequence length</b> | <b>% identity between consensus sequences</b> | <b>SNP difference between consensus sequences</b> | <b>SNPs in ORF1</b> | <b>SNPs in ORF2</b> | <b>SNPs in ORF3</b> |
|-----------------------|-------------------------------------|--------------------------------|-------------------|----------------------------------|-----------------------------------------------|---------------------------------------------------|---------------------|---------------------|---------------------|
| <b>GII.3 original</b> | Noro-14069                          | 413,812                        | 3,154             | 7,555                            |                                               |                                                   |                     |                     |                     |
|                       |                                     |                                |                   |                                  | 97.61                                         | 178                                               | 163/178             | 15/178              | 0/178               |
| <b>GII.3 mixed</b>    | Noro-14069 & -28464                 | 630,742                        | 3,850             | 7,459                            |                                               |                                                   |                     |                     |                     |
| <b>GII.4 original</b> | Noro-28464                          | 431,263                        | 2,917             | 7,489                            |                                               |                                                   |                     |                     |                     |
|                       |                                     |                                |                   |                                  | 95.53                                         | 332                                               | 284/332             | 22/332              | 26/332              |
| <b>GII.4 mixed</b>    | Noro-14069 & -28464                 | 676,523                        | 4,017             | 7,426                            |                                               |                                                   |                     |                     |                     |

**Table A6.** Summary of norovirus whole genome sequencing reports in the literature

| Author                     | Country     | Method                                                | Sequencing platform | Assembly          | Number of samples | Genotypes (% success*)                                                                                                                                    | % OTR                | Genome coverage        | Read depth           |
|----------------------------|-------------|-------------------------------------------------------|---------------------|-------------------|-------------------|-----------------------------------------------------------------------------------------------------------------------------------------------------------|----------------------|------------------------|----------------------|
| <b>Chhabra (2010)(1)</b>   | India       | Overlapping PCR (9 amplicons)                         | Sanger sequencing   | Not stated        | 3                 | GII.4 and<br>GII.b_GII.3†                                                                                                                                 | n/a**                | 100%                   | n/a††                |
| <b>Won (2013)(2)</b>       | South Korea | Overlapping PCR (10 amplicons)                        | Sanger sequencing   | Not stated        | 1                 | GII.P12_GII.13†                                                                                                                                           | n/a**                | 100%                   | n/a††                |
| <b>Eden (2013) (3)</b>     | Australia   | Long PCR (7.6kb)                                      | Sanger sequencing   | Not applicable    | 25                | GII.4†                                                                                                                                                    | n/a**                | 100%                   | n/a††                |
| <b>Kundu (2013)(4)</b>     | UK          | Overlapping PCR (22 amplicons)                        | Roche 454           | De novo           | 13                | GII.4 †                                                                                                                                                   | n/a**                | 86–99%                 | Median 580 (423–951) |
| <b>Cotten (2014) (5)</b>   | Vietnam     | Overlapping PCR (3 amplicons)                         | Illumina MiSeq      | De novo           | 265               | GI (20%)<br>GII.2 (40%)<br>GII.3 (77%)<br>GII.4 (92%)<br>GII.6 (88%)<br>GII.7 (0%)<br>GII.9 (100%)<br>GII.12 (50%)<br>GII.13 (83%)<br>Overall success 78% | n/a**                | 100%                   | Not stated           |
| <b>Nakamura (2012) (6)</b> | Japan       | Whole transcriptome amplification kit (70 cycles PCR) | Roche 454           | Reference mapping | 5                 | GII.4 (40%)                                                                                                                                               | Median 3% (0.05–60%) | Median 84.5% (2.1–98%) | 9–259                |



| Author                            | Country     | Method                                                         | Sequencing platform        | Assembly          | Number of samples         | Genotypes (% success*)                                                                      | % OTR                                                              | Genome coverage                             | Read depth                                        |
|-----------------------------------|-------------|----------------------------------------------------------------|----------------------------|-------------------|---------------------------|---------------------------------------------------------------------------------------------|--------------------------------------------------------------------|---------------------------------------------|---------------------------------------------------|
| <b>Batty (2013)</b> (7)           | UK          | mRNA RNASeq                                                    | Illumina MiSeq and HiSeq   | Reference mapping | 3 (MiSeq) plus 77 (HiSeq) | GII.4 (99%)                                                                                 | MiSeq: median 1.8% (0.12–1.90)<br>HiSeq: median 2.7% (0.01–97.98%) | MiSeq: 97–99%<br>HiSeq: Mean 97% (59 – 99%) | MiSeq: Not stated<br>HiSeq: Median 100 (10–1,000) |
| <b>Wong (2013)</b> (8)            | UK          | mRNA RNASeq                                                    | Illumina MiSeq             | De novo           | 32                        | GII.4 (66%)                                                                                 | Not stated                                                         | 21/32 >97%                                  | Not stated                                        |
| <b>Bavelaar et al. (2015)</b> (9) | Netherlands | Whole transcriptome amplification with ribosomal RNA depletion | Ion Torrent PGM (318 chip) | Reference mapping | 10                        | GI.1 (100%)<br>GI.6 (100%)<br>GII.4 (100%)<br>GII.6 (100%)<br>GII.21 (100%)<br>GII.2 (100%) | Median 28% (0.7–70.9%)                                             | 100%                                        | Median 1309 (25–3607)                             |

\*>90% genome coverage

\*\* not applicable for PCR amplicon sequencing

† success rate not reported

†† Read depth not applicable for capillary sequencing

1. **Chhabra P, Walimbe AM, Chitambar SD.** 2010. Complete genome characterization of Genogroup II norovirus strains from India: Evidence of recombination in ORF2/3 overlap. *Infection, genetics and evolution : journal of molecular epidemiology and evolutionary genetics in infectious diseases* **10**:1101-1109.
2. **Won YJ, Park JW, Han SH, Cho HG, Kang LH, Lee SG, Ryu SR, Paik SY.** 2013. Full-genomic analysis of a human norovirus recombinant GII.12/13 novel strain isolated from South Korea. *PloS one* **8**:e85063.

3. **Eden JS, Tanaka MM, Boni MF, Rawlinson WD, White PA.** 2013. Recombination within the pandemic norovirus GII.4 lineage. *Journal of virology* **87**:6270-6282.
4. **Kundu S, Lockwood J, Depledge DP, Chaudhry Y, Aston A, Rao K, Hartley JC, Goodfellow I, Breuer J.** 2013. Next-generation whole genome sequencing identifies the direction of norovirus transmission in linked patients. *Clinical infectious diseases : an official publication of the Infectious Diseases Society of America* **57**:407-414.
5. **Cotten M, Petrova V, Phan MV, Rabaa MA, Watson SJ, Ong SH, Kellam P, Baker S.** 2014. Deep sequencing of norovirus genomes defines evolutionary patterns in an urban tropical setting. *Journal of virology* **88**:11056-11069.
6. **Nakamura S, Yang CS, Sakon N, Ueda M, Tougan T, Yamashita A, Goto N, Takahashi K, Yasunaga T, Ikuta K, Mizutani T, Okamoto Y, Tagami M, Morita R, Maeda N, Kawai J, Hayashizaki Y, Nagai Y, Horii T, Iida T, Nakaya T.** 2009. Direct metagenomic detection of viral pathogens in nasal and fecal specimens using an unbiased high-throughput sequencing approach. *PloS one* **4**:e4219.
7. **Batty EM, Wong TH, Trebes A, Argoud K, Attar M, Buck D, Ip CL, Golubchik T, Cule M, Bowden R, Manganis C, Klenerman P, Barnes E, Walker AS, Wyllie DH, Wilson DJ, Dingle KE, Peto TE, Crook DW, Piazza P.** 2013. A modified RNA-Seq approach for whole genome sequencing of RNA viruses from faecal and blood samples. *PloS one* **8**:e66129.
8. **Wong TH, Dearlove BL, Hedge J, Giess AP, Piazza P, Trebes A, Paul J, Smit E, Smith EG, Sutton JK, Wilcox MH, Dingle KE, Peto TE, Crook DW, Wilson DJ, Wyllie DH.** 2013. Whole genome sequencing and de novo assembly identifies Sydney-like variant noroviruses and recombinants during the winter 2012/2013 outbreak in England. *Virology journal* **10**:335.
9. **Bavelaar HH, Rahamat-Langendoen J, Niesters HG, Zoll J, Melchers WJ.** 2015. Whole genome sequencing of fecal samples as a tool for the diagnosis and genetic characterization of norovirus. *Journal of clinical virology : the official publication of the Pan American Society for Clinical Virology* **72**:122-125.
